# Supplementary material for: APhen-functionalized nanoparticles–polymer fluorescent nanocomposites via ligand exchange and in situ bulk polymerization
Source: Royal Society of Chemistry journal article supplement (doi:10.1039/b709566j), 2007-01-01
Supplement: b709566j.pdf [file b709566j.pdf]

**A<sup>Phen</sup>-functionalized nanoparticles/polymer fluorescent nanocomposites via  
ligand exchange and in-situ bulk polymerization**

*Junfang Gao, Changli Lü,\* Xiaodan Lü and Yaying Du*

*College of Chemistry, Northeast Normal University, Changchun 130024, P.R. China.*

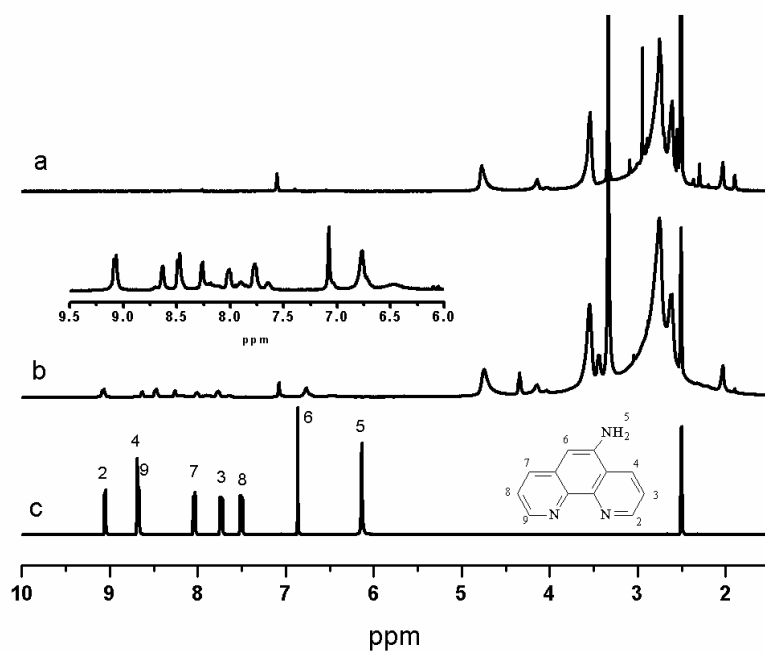

Fig. 1S. <sup>1</sup>H-NMR spectra of ME-ZnS NPs (a), APhen-ZnS NPs (I) (b) and APhen (c) in *d*<sub>6</sub>-DMSO.

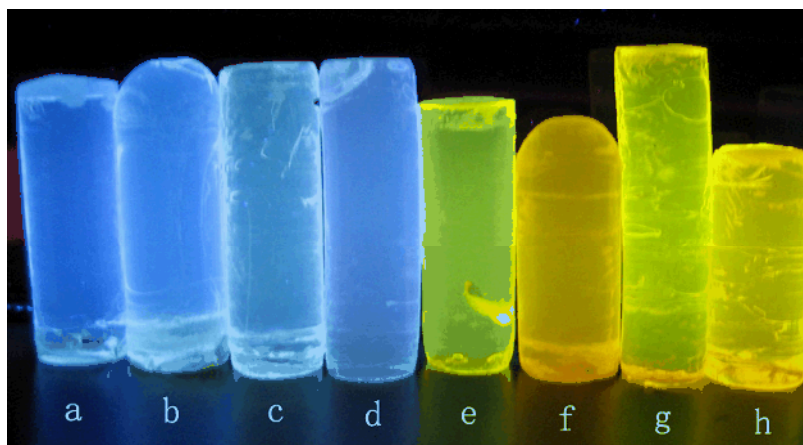

Fig.2S. PL images of different ZnS NPs/polymer bulk nanocomposites excited by an ultraviolet lamp at 360nm: (a) polymer, (b) ME-ZnS NPs(5%)/polymer, (c) ME-ZnS NPs(5%)/polymer, (d) APhen-ZnS NPs(0.5%)/polymer, (e) APhen-ZnS NPs (5%)/polymer, (f) APhen-ZnS NPs(5%)/polymer, (g) APhen-ZnS NPs(5wt%)/ polymer-MAA, (h) APhen-ZnS NPs(5%)/polymer-GMA.

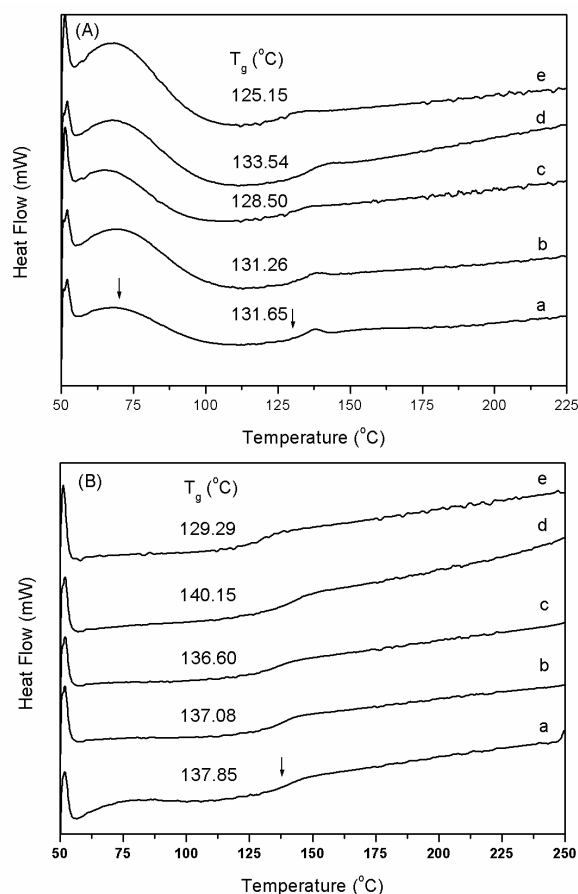

Fig.3S. DSC curves before (A) and after (B) thermal treatment for different nanocomposites: (a) polymer, (b) ME-ZnS NPs(5%)/polymer, (c) APhen-ZnS(5%) /polymer, (d) APhen-ZnS (5%)/polymer-MAA, (e) APhen-ZnS (5%)/polymer-GMA.
